# Supplementary material
Source: publisher site journal article supplement (https://www.dovepress.com/article/360605)
Supplement: Supplementary file 1 [file get_supplementary_file.php]

**Supplementary materials**

**Supplementary Table 1**: Socio-demographic, behavioral, and Clinical characteristics of the study participants (N=314)

| Variables | Categories | AEFI (N=314) | | | |
| --- | --- | --- | --- | --- | --- |
| Yes | No | Total | Percent |
| Sex | Male | 181 | 43 | 224 | 71.34 |
| Female | 80 | 8 | 88 | 28.03 |
| Missed | 2 | 0 | 2 | 0.64 |
| Age in year | Median (IQR) | 25 (23, 28) | 24 (23, 26) | 25 (23, 28) | IQR |
| Religion | Christian | 227 | 42 | 269 | 85.67 |
| Others | 36 | 9 | 45 | 14.23 |
| Highest qualification | Diploma and above | 153 | 36 | 189 | 60.19 |
| Bachelor's Degree and above | 110 | 15 | 125 | 39.81 |
| Comorbidities | No | 251 | 49 | 300 | 95.54 |
| Yes* | 9 | 2 | 11 | 3.50 |
| Missed | 3 | 0 | 3 | 0.96 |
| Number of vaccine doses taken | One | 212 | 47 | 259 | 82.48 |
| Two | 51 | 4 | 55 | 17.52 |
| Feeling towards the vaccine safety | Not safe | 53 | 5 | 58 | 19.27 |
| Safe | 133 | 31 | 164 | 54.48 |
| Neutral | 68 | 11 | 79 | 26.25 |
| Believes that the vaccine will have AEFI? | Yes | 200 | 32 | 232 | 77.33 |
| No | 21 | 10 | 31 | 10.33 |
| I do not know | 32 | 5 | 37 | 12.33 |

*(Diabetic Mellitus=3, Hypertension=3, Bronchial Asthma=3, and renal diseases=1)

**Supplementary Table 2:** Self-reported history of drug, food, or other reactions and COVID-19 infection

| **Variables** | **Categories** | **Frequency** | **Percent** |
| --- | --- | --- | --- |
| Past history of AEFI (n=258) | Yes | 8 | 3.10 |
| No | 219 | 84.88 |
| Unknown | 31 | 12.02 |
| History of food allergy (n=260) | Yes | 7 | 2.69 |
| No | 238 | 91.54 |
| Unknown | 11 | 4.23 |
| Missed | 1 | 0.38 |
| Preexisting acute illness (n=257) | Yes | 12 | 4.67 |
| No | 237 | 92.22 |
| Unknown | 8 | 3.11 |
| History of positive COVID-19 test (n=259) | Yes | 21 | 8.11 |
| No | 203 | 78.38 |
| Unknown | 35 | 13.51 |
| Family history of allergy (n=258) | Yes | 10 | 3.88 |
| No | 236 | 91.47 |
| Unknown | 12 | 4.65 |
| Grading of the symptom(N=257) | Severe | 20 | 7.78 |
| Moderate | 73 | 28.40 |
| Mild | 162 | 63.04 |
| Difficult to scale | 2 | 0.78 |

**Supplementary Table 3:** Binary logistic regression to identify factors associated with AEFI development (N=314)

| **Variables** | **Categories** | **AEFI (N=314)** | | **COR (95% CI)** | **AOR (95% CI)** |
| --- | --- | --- | --- | --- | --- |
| **Yes** | **No** |
| Sex | Male | 181 | 43 | 1 |  |
| Female | 80 | 8 | 2.38 (1.07, 5.28) | 2.75 (1.15, 6.58)* |
| Age in year | Median (IQR) | 25 (23, 28) | 24 (23, 26) | 1.06 (0.98, 1.15) | 0.99 (0.90, 1.11) |
| Religion | Cristian | 227 | 42 | 1 | 1 |
| Other | 36 | 9 | 0.74 (0.33, 1.65) | 0.75 (0.32, 1.76) |
| Highest qualification | Diploma and student | 153 | 36 | 1 | 1 |
| Bachelor Degree and above | 110 | 15 | 1.73 (0.90, 3.31) | 1.63 (0.64, 4.19) |
| Number of vaccine doses taken | One | 212 | 47 | 1 |  |
| Two | 51 | 4 | 2.83 (0.97, 8.20) | 2.40 (0.73, 7.92) |
| Feeling towards vaccine safety | Safe | 133 | 31 | 1 | 1 |
| Not Safe | 53 | 5 | 2.47 (0.91, 6.69) | 2.84 (1.03, 7.85)* |
| I don’t know | 68 | 11 | 1.44 (0.68, 3.04) | 1.40 (0.65, 3.01) |
| *AEFI: adverse event following immunization; COR: crude odds ratio; AOR: adjusted odds ratio; * statistically significant variable* | | | | | |

**Data collection questionnaire**

AstraZeneca (ChAdox1 nov COV-19) COVID-19 vaccine Post Immunization Adverse Event in Northwest Ethiopia; The case of University of Gondar Comprhensive Specialized Hospital.

Supplemntary table 4: Questionnaire used for data collection

| Sr.number | Questions | Answers |
| --- | --- | --- |
| 1. | Age in years | ______ |
| 2. | Sex | 1. Male 2. Female |
| 3 | Religion | 1.Orthodox 2. Muslim 3. Protestant 4. Catholic 5. Others, specify____________ |
| 4 | Highest qualification | 1, Diploma 2. Bachelors 3. MSc/MPH 4. Specialty 5. Ph.D. 6. Student |
| 5 | occupation | 1. Intern 2.Resident 3.Internist 4. Surgeon 5. Pediatrician 6. Gynecologist and or Obstetrician 7. Psyciatriest 8.ophthalmologist 9. Detist 10 midwifery 11. Nurse 12. Health officer 13.medical laboratorist 14. Pharmacist 15.Health officer 16.Health professional (Academic staff only)   17.Administrative staff 18. Others, specify_____ |
| 6. | Do you have any comorbidities (Multiple responses is possible) | 1. None 2. Diabetes mellitus 3.Hypertension 4.HIV   5.Asthma 6. COPD 7.Epilepsy 8.Cancer  9.Cardiac diseases 10.Renal disease 11. Bleeding disorder 12.Infections ( VL, TB, ) 12.others, specify_______ |
| COVID vaccine-related | | |
| 7. | How many doses have you taken? | 1. O 2. 1st dose 3. 2nd dose |
| 8. | Date of vaccination in E.C | 1st dose :DD/MM/YY(____/______/_________)  2nd dose: DD/MM/YY(____/______/_________) |
| 9. | Do you have one of the following symptoms after taking the vaccine? (multiple responses are possible) | 1.injection site tenderness, or pain or redness, swelling  2. systematic reaction 3. seizures  4..Abscess 5.High-grade fever (>380C) 6.Anaphylaxis 7..Bleeding 8.Thrombocytopenia 9. Toxic shock syndrome  10.Fatigue 11. Joint pain 12. Muscle pain  13. Chills 14. Headache  15.malaise 16.Flu-like symptoms  17.Nause 18.Vomiting  19. Others specify_________ 20. no symptom at all **, if no symptom go to Q26** |
| 10 | Are these symptoms following first or 2nd dose of the vaccine | 1. Following 1st dose 2. Following 2nd dose 3. On both doses |
| 11 | How do you scale the symptom? | 1. Sever 2.Moderate 3. Mild 4.difficult to scale |
| 12 | Date of onset of symptoms | DD/MM/YY(______/______/________) |
| 13 | After howmany days following immunization you developed the Adverse Event Following Immunization (AEFI) symptoms | ____________ |
| 14 | Do you have past history of adverse event after immunization for other vaccines | 1.Yes 2.no 3. Unknown  **if your answer is no or unknown, go to question 16** |
| 15 | If yes to Q14, for which vaccine were you have allergies? | _______ |
| 16 | Any history of allegries to foods or drugs? | 1.Yes 2.no 3. unknown |
| 17 | Pre-existing acute illness within 3o days | 1.Yes 2.no 3. unknown |
| 18 | Have you tested positive for COVID-19 prior to vaccination | 1.Yes 2.no 3. unknown |
| 19 | Family history of similar illness or allergy | 1.Yes 2.no 3. unknown |
| 20 | Are you taking any medications currently | 1. Yes 2.no _______i*f no go to question go to Question 21* |
| 21 | If yes to Q20, list the medications you are using currently | ___________________________________________________ |
| 22 | How long the Adverse Event Following Immunization (AEFI) symptoms to resolve take | ____________ |
| 23 | Which medicines did you use for symptomatic relief | 1.Paracetamol 2. Diclofenac 3.Tramadol  4.Ibuprofen 5.Other (specify) ________ |
| 24. | What was the outcome of the illness/event | 1. recovered without any intervention  2. recovered with minor intervention  3. Admitted to the health facilities and recovered without sequels  4. admitted to health facilities and recovered with a sequels  5. others, specify_____ |
| 25 | If you were admitted, what was the cause of admission? | ____________________________________ |
| 26 | What do you feel about the vaccine? | 1.I feel it is very safe 2. I feel it is very effecitive to protect me  3. I feel it is not safe but effective 4. I feel it is safe to take but not effective 5. I don't know |
| 27 | Do you believe that the vaccine will have adverse event? | 1. Yes, I’m strongly suspicious 2. It might be 3. Neutral 4. I don’t expect 5. I completely disagree with this Idea |
| 28 | Do you want take the 2nd and 3rd doses? | 1. yes, certainly 2. Yes, I may 3. No, I don't 4. Difficult to decide   5.others,specify_______ |
| 29 | If you are not certain to take next doses, What was the reason? | 1. fear of the vaccine side effect 2. suspicion of vaccine efficacy  3. suggestion from families 4.other,specify___________________ |
| 30 | What do you advise for others about the vaccine | 1. I'll advice them to take the vaccine 2. I'll advice them not to take the vaccine 3. I want to keep quit 4. I don't know  5.Others specify________________ |
| Any thing to say related to COVID-19 vaccine? Please write your feelings or suggestions | | |
|  |  |  |

Thank you for your cooperation!
